## Artificial intelligence derived age algorithm after heart transplantation

I. Ozcan<sup>1</sup>, T. Toya<sup>1</sup>, M. Cohen-Shelly<sup>1</sup>, A. Ahmad<sup>1</sup>, M.T. Corban<sup>1</sup>, P.A. Noseworthy<sup>1</sup>, S. Kapa<sup>1</sup>, L.O. Lerman<sup>2</sup>, Z.I. Attia<sup>1</sup>, P.A. Friedman<sup>1</sup>, S.S. Kushwaha<sup>1</sup>, A. Lerman<sup>1</sup>

<sup>1</sup>Mayo Clinic, Department of Cardiovascular Medicine, Rochester, United States of America; <sup>2</sup>Mayo Clinic, Division of Nephrology and Hypertension, Rochester, United States of America

**Funding Acknowledgement:** Type of funding sources: None.

**Background:** An artificial intelligence (AI) algorithm detecting age from 12-lead ECG has been suggested to signal “physiological age” of the individual. Importantly, increased physiological age gauged by an increased difference between ECG-age and chronological age has been associated with higher risk of cardiac events in non-transplant population.

**Purpose:** We sought to investigate the validity of the AI-derived ECG-age algorithm in patients who underwent heart transplantation and its relationship to major adverse cardiovascular events (MACE).

**Methods:** A total of 489 consecutive patients who had undergone heart transplantation in our institution between 1994 and 2018 were studied. AI-ECG age was calculated by a previously-trained artificial intelligence (AI) algorithm using a 12-lead ECG per patient. ECGs used in the training process of the algorithm were excluded. The average of the ECG-ages within one year before and one year after heart transplantation was used to represent pre- and post-transplant ECG-ages. MACE was defined as any incidence of revascularization, re-transplantation, and death.

**Results:** Pre-transplant ECG-age (mean 63±10 years) correlated significantly with recipient chronological age (mean 50±13 years,  $r=0.57$ ,  $p<0.0001$ ), but this correlation between recipient and ECG-ages was weakened after transplantation (mean post-transplant ECG age of 55±10

years,  $r=0.34$ ,  $p<0.0001$ ). Interestingly, post-transplant ECG-age correlated significantly with donor age (mean ECG age of 55±10 years vs. mean donor age of 32±13 years,  $r=0.42$ ,  $p<0.0001$ ). During a median (IQR) follow-up of 9 (5, 14) years, 251 patients had MACE. Mean change in ECG age after transplantation compared to before was  $-8.8\pm 12.7$  years. Patients who had an increase in ECG-age after compared to before transplantation showed increased risk of MACE (HR: 1.53 [1.16, 2.01],  $p=0.002$ ), independent of recipient and donor ages (adjusted HR: 1.68 [1.26, 2.25],  $p=0.001$ ); whereas there were no significant differences in risk of MACE in patients who were transplanted with an older donor heart (HR: 1.07 [0.77, 1.50],  $p=0.66$ ). In a Kaplan Meier survival analysis, those with increased ECG-age after transplantation had significantly lower MACE-free survival compared to those with decreased ECG-age. (Log-rank  $P=0.002$ ; Wilcoxon  $P=0.001$ ) (Figure)

**Conclusion:** Post-transplant ECG-age correlates more faithfully with the donor’s than the recipient’s chronological age, suggesting that ECG-age more closely reflects cardiac age than the patient age. Furthermore, ECG-age derived cardiac aging after transplantation is associated with higher risk of MACE.

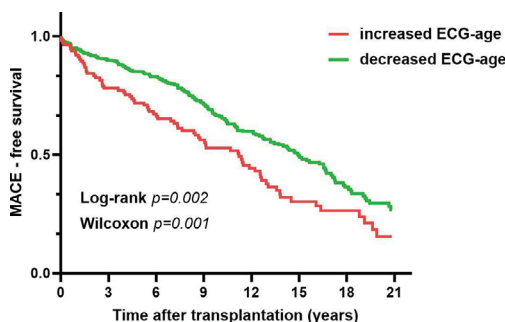

Source: http://academic.oup.com/eurheartj/article-pdf/42/Supplement_1/ehab724.2272/40593953/ehab724.2272.pdf
